# Supplementary material for: Green dodecylamine-capped hafnium oxide nanosystem: evaluating the toxicity profile and electrochemical hydrogen sulfide sensing efficiency
Source: Royal Society of Chemistry journal article supplement (doi:10.1039/d2tc03722j), 2022-11-15
Supplement: d2tc03722j1.pdf [file d2tc03722j1.pdf]

## SUPPLEMENTARY INFORMATION

### Green dodecylamine capped hafnium oxide nanosystem: evaluating toxicity profiling and electrochemical hydrogen sulfide sensing efficiency

Mehar Singh<sup>a</sup>, Abhinav Kapur<sup>a</sup>, Urmila Chakraborty<sup>a</sup>, Moondeep Chauhan<sup>b</sup>, Gurpreet Kaur<sup>a,\*</sup>, Ajeet Kaushik<sup>c,d</sup>, Ebrahim Mostafavi<sup>e,f,\*</sup>, and Ganga Ram Chaudhary<sup>a,g,\*</sup>

<sup>a</sup>Department of Chemistry, Centre of Advanced Studies in Chemistry, Panjab University, Chandigarh, 160014, India.

<sup>b</sup>Cluster Innovation Center in Biotechnology (CIC-B), Panjab University, 160025 Chandigarh, India

<sup>c</sup>School of Engineering, University of Petroleum and Energy Studies (UPES), Dehradun, Uttarakhand, India

<sup>d</sup>NanoBioTech Laboratory, Department of Natural Sciences, Division of Science, Arts & Mathematics, Florida Polytechnic University, Lakeland, Florida 33805, USA.

<sup>e</sup>Stanford Cardiovascular Institute, Stanford University School of Medicine, Stanford, CA 94305, USA

<sup>f</sup>Department of Medicine, Stanford University School of Medicine, Stanford, CA 94305, USA

<sup>g</sup>Sophisticated Analytical Instrumentation Facility (SAIF)/CIL, Panjab University, Chandigarh, 160014, India.

\*Correspondence: [grc22@pu.ac.in](mailto:grc22@pu.ac.in) (G.R.C.); [gurpreet14@pu.ac.in](mailto:gurpreet14@pu.ac.in) (G.K.); [ebimsv@stanford.edu](mailto:ebimsv@stanford.edu) (E.M.)

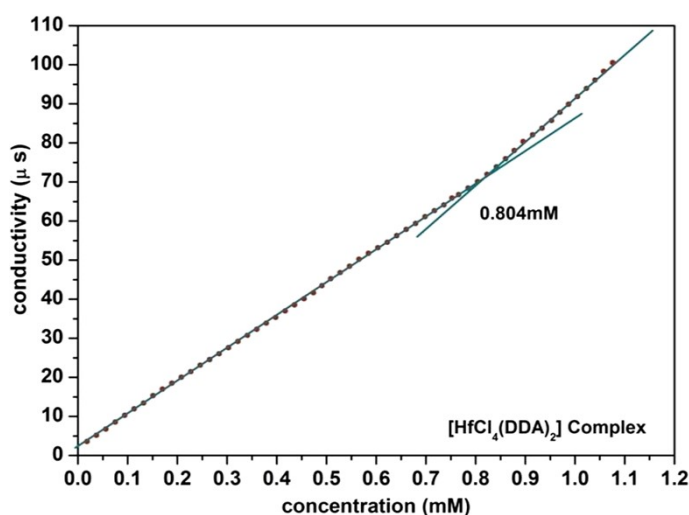

**Fig. S1.** Calculation of CMC of [HfCl<sub>4</sub>(DDA)<sub>2</sub>] complex via conductivity studies in aqueous medium.

## SUPPLEMENTARY INFORMATION

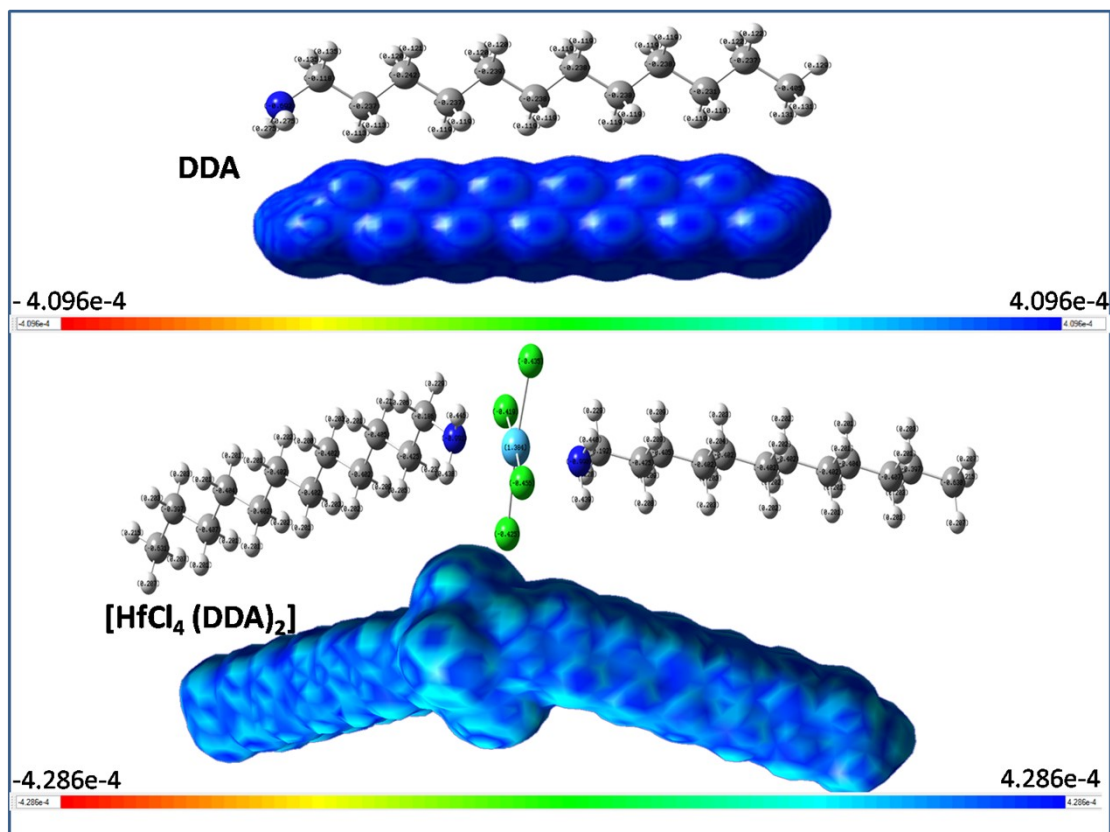

**Fig. S2.** Mulliken Charges and total electron density isoplots prediction about the interaction of DDA with HfCl<sub>4</sub> and feasibility of [HfCl<sub>4</sub>(DDA)<sub>2</sub>] complex.

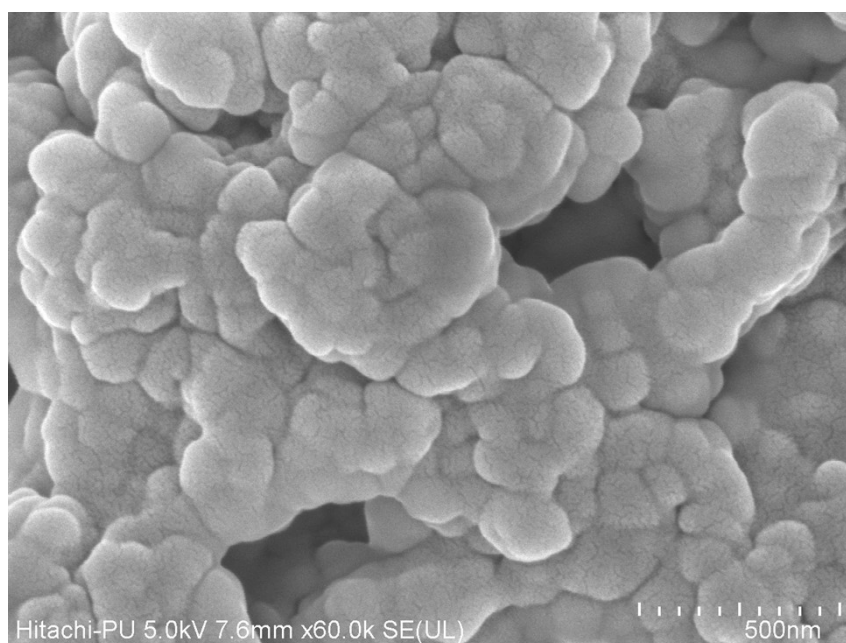

**Fig. S3.** FESEM image of agglomerated bare HfO<sub>2</sub> Nanoparticles.

SUPPLEMENTARY INFORMATION

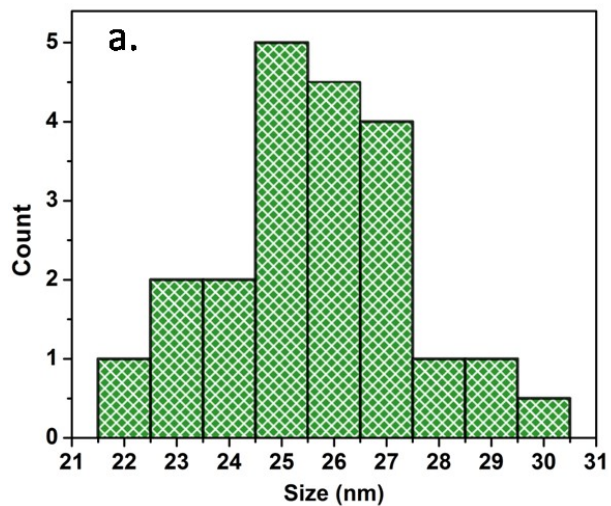

Fig. S4. (a.) Average Size (20-30 nm) estimation

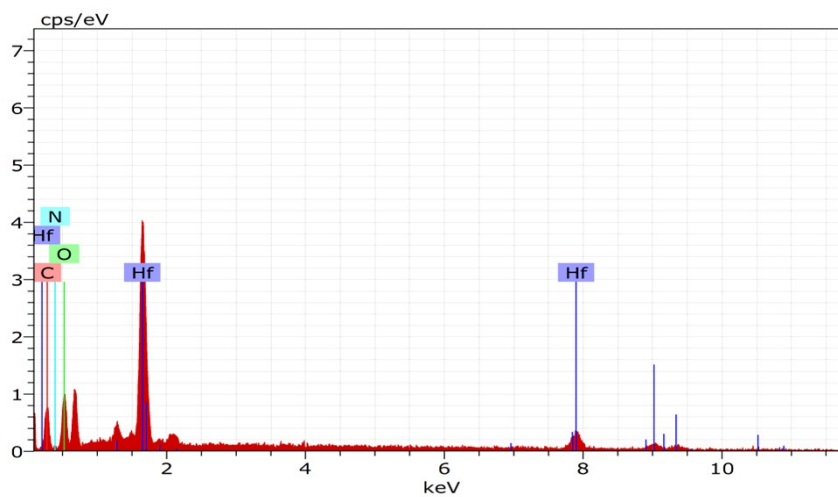

Fig. S5. EDS spectra of DDA@HfO<sub>2</sub> NM.

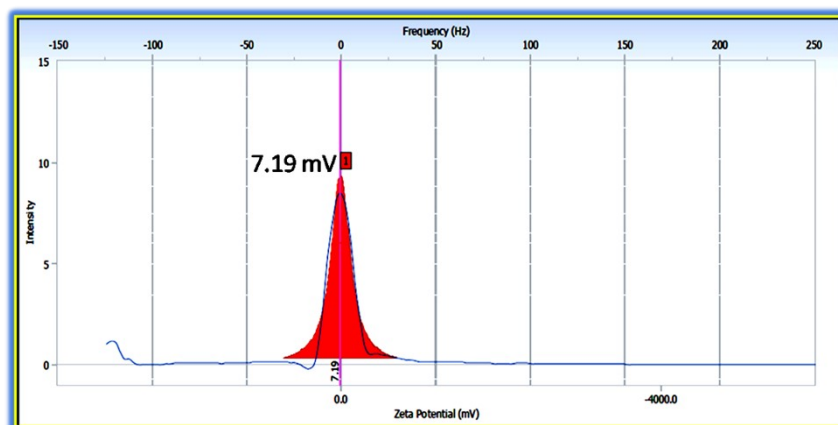

Fig. S6. Zeta potential of DDA@HfO<sub>2</sub> NM.

**SUPPLEMENTARY INFORMATION**

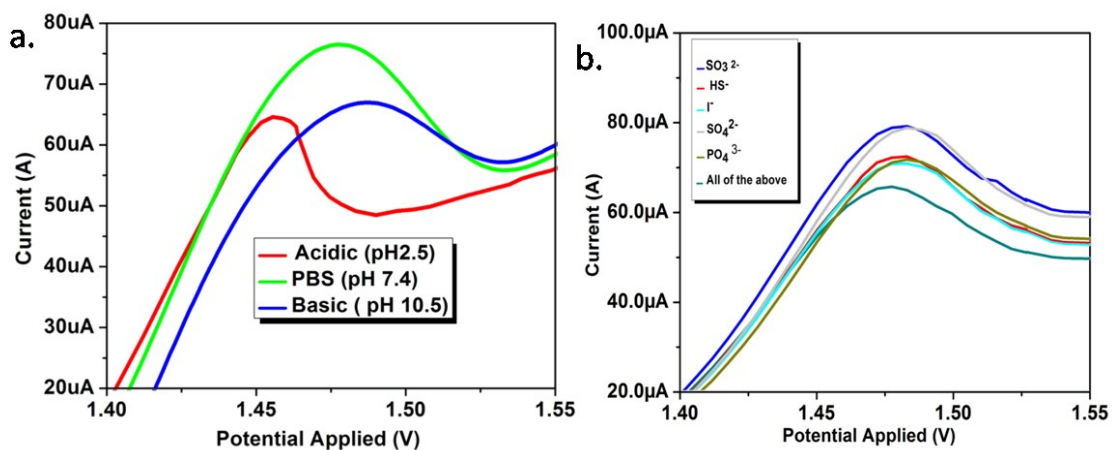

**Fig. S7.** (a.) current response with varied pH( $10 \mu\text{M}$ ), (b.) Interference studies ( $\text{SO}_3^{2-}$ ,  $\text{HS}^-$ ,  $\text{I}^-$ ,  $\text{SO}_4^{2-}$ ,  $\text{PO}_4^{3-}$ ).

**Table S1.** Recovery (%) of  $\text{HS}^-$  in real samples by  $\text{DDA@HfO}_2/\text{Au}$  nanosystem

| Added $\text{Na}_2\text{S}$<br>( $\mu\text{M}$ ) | Recovered<br>( $\mu\text{M}$ ) | Recovery<br>(%) | RSD |
|--------------------------------------------------|--------------------------------|-----------------|-----|
| <b>Tap Water</b>                                 |                                |                 |     |
| 10                                               | 9.2                            | 92              |     |
| 40                                               | 38.2                           | 95.5            | 5.2 |
| 80                                               | 78.6                           | 98              |     |
| <b>Rain Water</b>                                |                                |                 |     |
| 10                                               | 9.5                            | 95              |     |
| 40                                               | 38.6                           | 96.5            |     |
| 80                                               | 78.4                           | 98              | 4.8 |
| <b>Hand pump</b>                                 |                                |                 |     |
| 10                                               | 9.0                            | 96              |     |
| 40                                               | 38.5                           | 96.25           | 4.2 |
| 80                                               | 76.8                           | 96              |     |
